# Supplementary material for: Elucidating genes and gene networks linked to individual susceptibility to milk fat depression in dairy goats
Source: Front Vet Sci. 2022 Dec 15;9:1037764. doi: 10.3389/fvets.2022.1037764 (PMC9798324; doi:10.3389/fvets.2022.1037764)
Supplement: Supplementary file 10 [file Table_10.xlsx]

## Sheet: Hoja1
Table S10. Results from the functional enrichment analyses for upregulated genes in RESPO− goats
Category	ID	Name	Source	p-value	q-value Bonferroni	q-value FDR B&H	q-value FDR B&Y	Hit Count in Query List	Hit Count in Genome	Hit in Query List
GO: Molecular Function	GO:0016901	oxidoreductase activity, acting on the CH-OH group of donors, quinone or similar compound as acceptor		0.000412	0.01442	0.005407	0.02242	1	2	GPD1
GO: Molecular Function	GO:0004368	glycerol-3-phosphate dehydrogenase (quinone) activity		0.000412	0.01442	0.005407	0.02242	1	2	GPD1
GO: Molecular Function	GO:0047952	glycerol-3-phosphate dehydrogenase [NAD(P)+] activity		0.000618	0.02163	0.005407	0.02242	1	3	GPD1
GO: Molecular Function	GO:0004367	glycerol-3-phosphate dehydrogenase [NAD+] activity		0.000618	0.02163	0.005407	0.02242	1	3	GPD1
GO: Molecular Function	GO:0030156	benzodiazepine receptor binding		0.00103	0.03604	0.007208	0.02989	1	5	DBI
GO: Molecular Function	GO:0031849	olfactory receptor binding		0.001236	0.04325	0.007208	0.02989	1	6	RTP4
GO: Molecular Function	GO:0036042	long-chain fatty acyl-CoA binding		0.001647	0.05766	0.008237	0.03416	1	8	DBI
GO: Molecular Function	GO:0000062	fatty-acyl-CoA binding		0.005346	0.1871	0.02158	0.08951	1	26	DBI
GO: Molecular Function	GO:1901567	fatty acid derivative binding		0.005757	0.2015	0.02158	0.08951	1	28	DBI
GO: Molecular Function	GO:0120227	acyl-CoA binding		0.006167	0.2158	0.02158	0.08951	1	30	DBI
GO: Molecular Function	GO:0051287	NAD binding		0.01353	0.4735	0.04305	0.1785	1	66	GPD1
GO: Biological Process	GO:1905920	positive regulation of CoA-transferase activity		0.0003958	0.1183	0.02958	0.1858	1	2	DBI
GO: Biological Process	GO:1905918	regulation of CoA-transferase activity		0.0003958	0.1183	0.02958	0.1858	1	2	DBI
GO: Biological Process	GO:0046168	glycerol-3-phosphate catabolic process		0.0003958	0.1183	0.02958	0.1858	1	2	GPD1
GO: Biological Process	GO:1903060	negative regulation of protein lipidation		0.0003958	0.1183	0.02958	0.1858	1	2	DBI
GO: Biological Process	GO:0006127	glycerophosphate shuttle		0.0005936	0.1775	0.0355	0.2229	1	3	GPD1
GO: Biological Process	GO:0050748	negative regulation of lipoprotein metabolic process		0.0009892	0.2958	0.0414	0.26	1	5	DBI
GO: Biological Process	GO:0042180	cellular ketone metabolic process		0.001175	0.3513	0.0414	0.26	2	286	GPD1,DBI
GO: Biological Process	GO:1903059	regulation of protein lipidation		0.001385	0.414	0.0414	0.26	1	7	DBI
GO: Biological Process	GO:0031999	negative regulation of fatty acid beta-oxidation		0.001385	0.414	0.0414	0.26	1	7	DBI
GO: Biological Process	GO:0006116	NADH oxidation		0.001385	0.414	0.0414	0.26	1	7	GPD1
GO: Biological Process	GO:0006650	glycerophospholipid metabolic process		0.001783	0.5331	0.04433	0.2784	2	353	GPD1,DBI
GO: Biological Process	GO:0006072	glycerol-3-phosphate metabolic process		0.001978	0.5913	0.04433	0.2784	1	10	GPD1
GO: Biological Process	GO:0052646	alditol phosphate metabolic process		0.002373	0.7095	0.04433	0.2784	1	12	GPD1
GO: Biological Process	GO:2001140	positive regulation of phospholipid transport		0.00257	0.7685	0.04433	0.2784	1	13	DBI
GO: Biological Process	GO:0046322	negative regulation of fatty acid oxidation		0.00257	0.7685	0.04433	0.2784	1	13	DBI
GO: Biological Process	GO:0006644	phospholipid metabolic process		0.002719	0.8128	0.04433	0.2784	2	437	GPD1,DBI
GO: Biological Process	GO:0021670	lateral ventricle development		0.002768	0.8276	0.04433	0.2784	1	14	DBI
GO: Biological Process	GO:2001138	regulation of phospholipid transport		0.002768	0.8276	0.04433	0.2784	1	14	DBI
GO: Biological Process	GO:0046486	glycerolipid metabolic process		0.002957	0.884	0.04433	0.2784	2	456	GPD1,DBI
GO: Biological Process	GO:0050746	regulation of lipoprotein metabolic process		0.002965	0.8866	0.04433	0.2784	1	15	DBI
GO: Biological Process	GO:0006952	defense response		0.003253	0.9727	0.04632	0.2908	3	1935	DBI,RTP4,SP140
GO: Biological Process	GO:0062012	regulation of small molecule metabolic process		0.003587	1	0.04875	0.3061	2	503	GPD1,DBI
GO: Cellular Component	GO:0009331	glycerol-3-phosphate dehydrogenase complex		0.0005919	0.01361	0.01361	0.05084	1	3	GPD1
GO: Cellular Component	GO:0005739	mitochondrion		0.003045	0.07003	0.03502	0.1308	3	1897	GPD1,DBI,SP140
GO: Cellular Component	GO:0097038	perinuclear endoplasmic reticulum		0.005318	0.1223	0.04077	0.1523	1	27	DBI
GO: Cellular Component	GO:0032994	protein-lipid complex		0.008067	0.1855	0.04639	0.1732	1	41	DBI
Pathway	1270011	Triglyceride Biosynthesis	BioSystems: REACTOME	0.0001069	0.002887	0.002887	0.01123	2	82	GPD1,DBI
Pathway	545367	glycerol-3-phosphate shuttle	BioSystems: BIOCYC	0.0004403	0.01189	0.005944	0.02313	1	2	GPD1
Pathway	SMP00124	Glycerol Phosphate Shuttle	SMPDB	0.0006604	0.01783	0.005944	0.02313	1	3	GPD1
Pathway	1270010	Fatty acid, triacylglycerol, and ketone body metabolism	BioSystems: REACTOME	0.001018	0.02747	0.006869	0.02673	2	253	GPD1,DBI
Pathway	M39394	HIF1A and PPARG regulation of glycolysis	MSigDB C2 BIOCARTA (v7.3)	0.00176	0.04753	0.009506	0.03699	1	8	GPD1
Pathway	SMP00039	Glycerolipid Metabolism	SMPDB	0.00264	0.07128	0.01188	0.04623	1	12	GPD1
Pathway	SMP00355	Mitochondrial Electron Transport Chain	SMPDB	0.003958	0.1069	0.01527	0.05941	1	18	GPD1
Pathway	SMP00025	Phospholipid Biosynthesis	SMPDB	0.005494	0.1484	0.01543	0.06004	1	25	GPD1
Pathway	M39547	PPAR Alpha Pathway	MSigDB C2 BIOCARTA (v7.3)	0.005714	0.1543	0.01543	0.06004	1	26	DBI
Pathway	M39692	Triacylglyceride Synthesis	MSigDB C2 BIOCARTA (v7.3)	0.005714	0.1543	0.01543	0.06004	1	26	GPD1
Pathway	M39592	Glycerophospholipid Biosynthetic Pathway	MSigDB C2 BIOCARTA (v7.3)	0.006591	0.178	0.01618	0.06296	1	30	GPD1
Pathway	1270055	Synthesis of PA	BioSystems: REACTOME	0.007468	0.2016	0.0168	0.06538	1	34	GPD1
Pathway	MAP00561_Glycerolipid_metabolism	MAP00561 Glycerolipid metabolism	GenMAPP	0.01031	0.2785	0.0199	0.07744	1	47	GPD1
Pathway	1270001	Metabolism of lipids and lipoproteins	BioSystems: REACTOME	0.01032	0.2786	0.0199	0.07744	2	816	GPD1,DBI
Pathway	1270012	Fatty Acyl-CoA Biosynthesis	BioSystems: REACTOME	0.01206	0.3257	0.02171	0.08448	1	55	DBI
Pathway	M39553	PPAR signaling pathway	MSigDB C2 BIOCARTA (v7.3)	0.01468	0.3964	0.02272	0.08841	1	67	DBI
Pathway	M13088	PPAR signaling pathway	MSigDB C2 BIOCARTA (v7.3)	0.01512	0.4081	0.02272	0.08841	1	69	DBI
Pathway	83042	PPAR signaling pathway	BioSystems: KEGG	0.01577	0.4258	0.02272	0.08841	1	72	DBI
Pathway	M39395	Sterol Regulatory Element-Binding Proteins (SREBP) signalling	MSigDB C2 BIOCARTA (v7.3)	0.01599	0.4317	0.02272	0.08841	1	73	DBI
Pathway	M9131	Glycerophospholipid metabolism	MSigDB C2 BIOCARTA (v7.3)	0.01686	0.4552	0.02276	0.08857	1	77	GPD1
Pathway	82989	Glycerophospholipid metabolism	BioSystems: KEGG	0.02077	0.5608	0.02671	0.1039	1	95	GPD1
Pathway	1270054	Glycerophospholipid biosynthesis	BioSystems: REACTOME	0.02835	0.7655	0.0348	0.1354	1	130	GPD1
